# Supplementary material for: Facile synthesis of insulin fusion derivatives through sortase A ligation
Source: PubMed Central journal article supplement — Acta Pharm Sin B. 2020 Nov 21;11(9):2719–25. doi: 10.1016/j.apsb.2020.11.011 (PMC8463260; doi:10.1016/j.apsb.2020.11.011), 2020-11-21
Supplement: mmc1.pdf [file mmc1.pdf]

## Supporting Information for

### Short communication

#### Facile synthesis of insulin fusion derivatives through sortase A ligation

Maria M. Disotuar<sup>a</sup>, Jake A. Smith<sup>a</sup>, Jinze Li<sup>a</sup>, Steve Alam<sup>a</sup>, Nai-Pin Lin<sup>a,b</sup>, Danny Hung-Chieh Chou<sup>a,b,\*</sup>

<sup>a</sup>*Department of Biochemistry, School of Medicine, University of Utah, Salt Lake City, UT 84112, USA*

<sup>b</sup>*Division of Endocrinology and Diabetes, Department of Pediatrics, School of Medicine, Stanford University, Palo Alto, CA 94305, USA*

\*Corresponding author. Tel. +1 650 724 6080, fax: +1 650 725 8375.

E-mail address: dannyhou@stanford.edu (Danny Hung-Chieh Chou).

Received 6 October 2020; received in revised form 29 October 2020; accepted 12 November

2020

#### Table of contents

|                                                                                       |   |
|---------------------------------------------------------------------------------------|---|
| <b>Table S1</b> Mass spectrometry for the insulin fusion derivatives. ....            | 2 |
| <b>Figure S1</b> LC-chromatogram (top) and MS-spectrum (bottom) for DOI. ....         | 2 |
| <b>Figure S2</b> LC-chromatogram (top) and MS-spectrum (bottom) for GFFYLPETGGG. .... | 3 |
| <b>Figure S3</b> LC-chromatogram (top) and MS-spectrum (bottom) for Ins-SA. ....      | 3 |
| <b>Figure S4</b> LC-chromatogram (top) and MS-spectrum (bottom) for Ins-SA-NBDX. .... | 4 |
| <b>Figure S5</b> LC-chromatogram (top) and MS-spectrum (bottom) for Ins-SA-Alb. ....  | 4 |

**Table S1** Mass spectrometry for the insulin fusion derivatives.

| Insulin fusion derivative | Calculated mass (Da) | Found mass (Da) | Method |
|---------------------------|----------------------|-----------------|--------|
| DOI                       | 4866                 | 1216 [M/4 + H]  | ESI    |
| GFFYLPETGGG               | 1144                 | 1145 [M + H]    | ESI    |
| Ins-SA                    | 5992                 | 1498 [M/4]      | ESI    |
| Ins-SA-NBDX               | 6392                 | 1599 [M/4 + H]  | ESI    |
| Ins-SA-Alb                | 8149                 | 1358 [M/6 +H]   | ESI    |

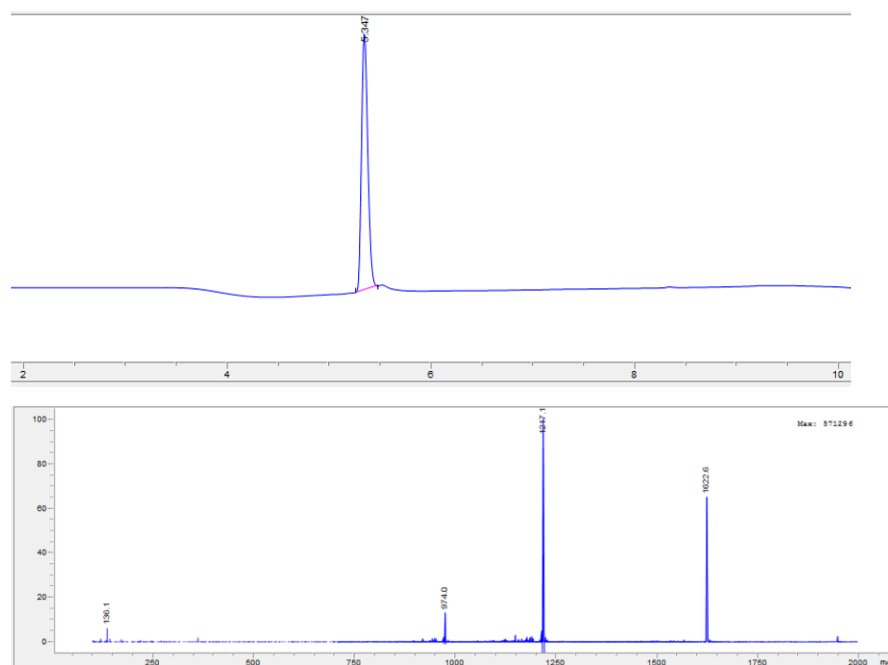

**Figure S1** LC-chromatogram (top) and MS-spectrum (bottom) for DOI.

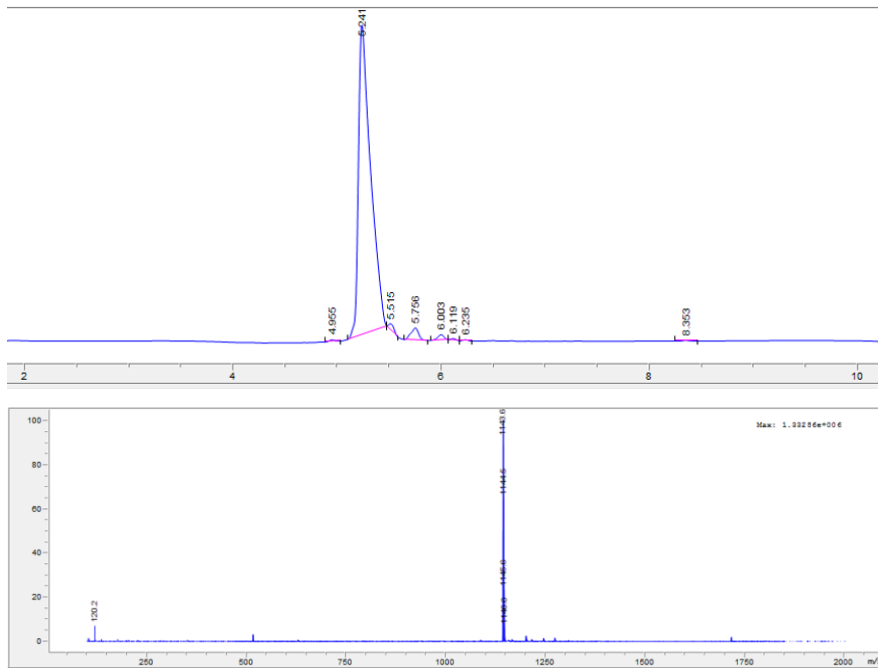

**Figure S2** LC-chromatogram (top) and MS-spectrum (bottom) for GFFYLPETGGG.

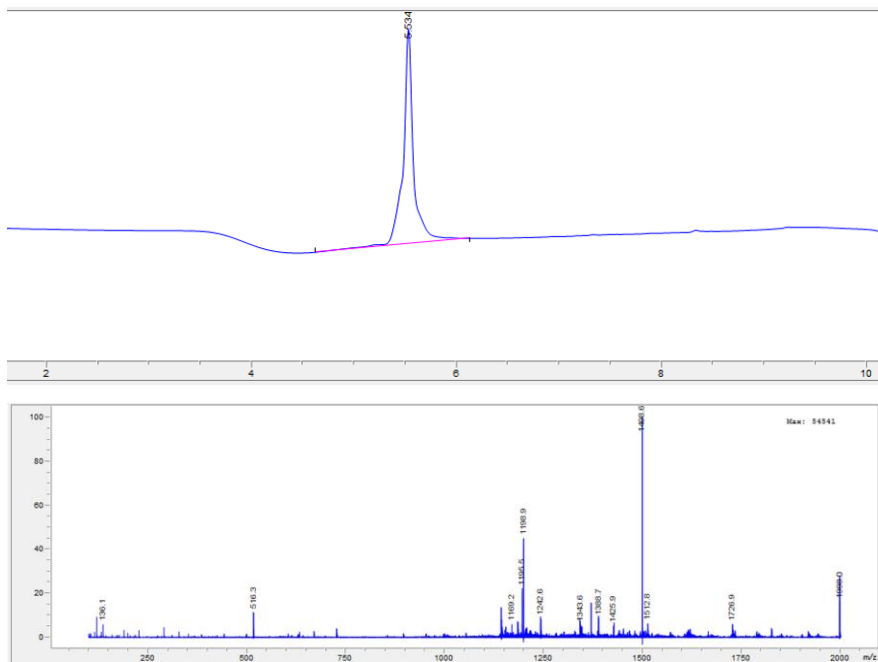

**Figure S3** LC-chromatogram (top) and MS-spectrum (bottom) for Ins-SA.

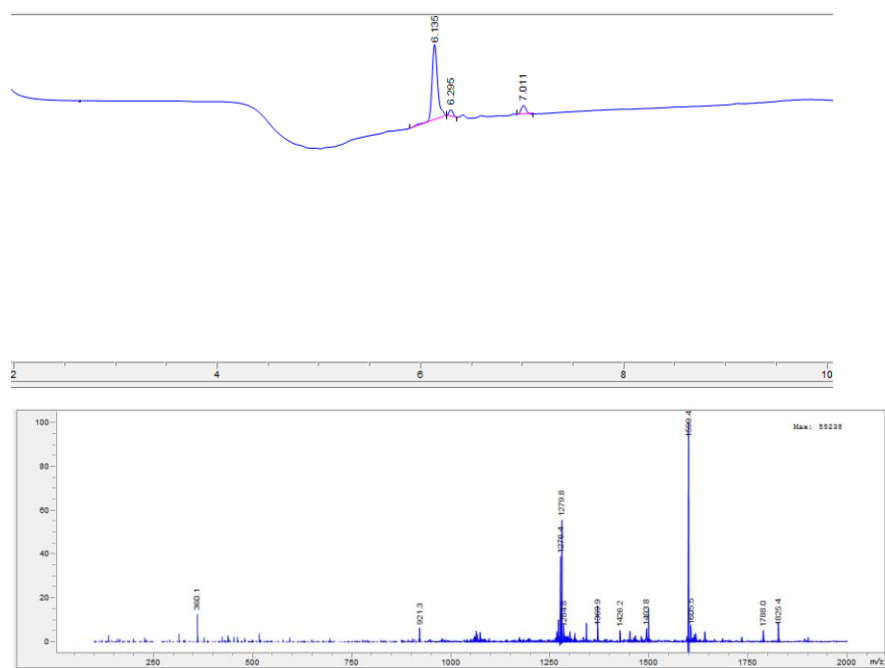

**Figure S4** LC-chromatogram (top) and MS-spectrum (bottom) for Ins-SA-NBDX.

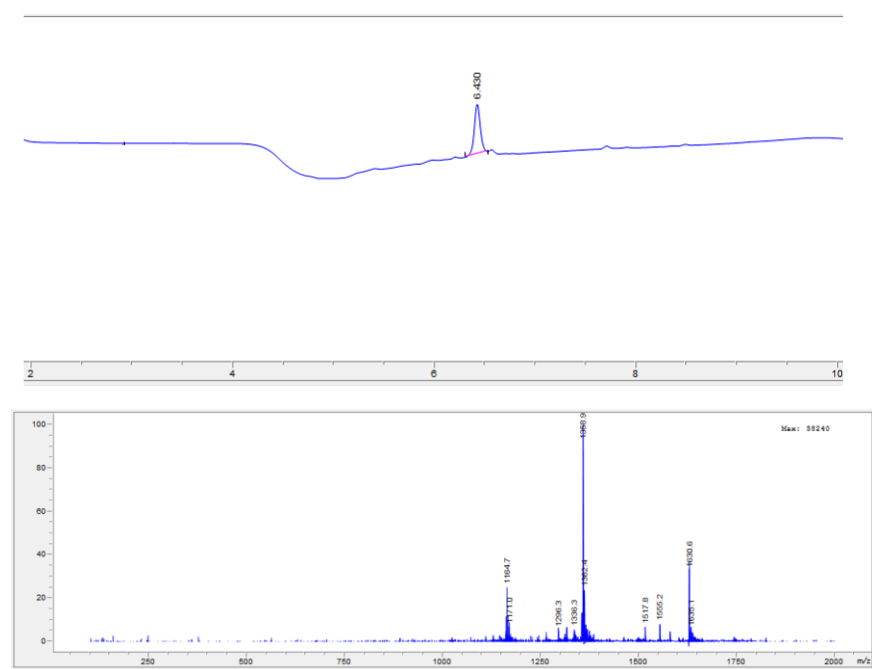

**Figure S5** LC-chromatogram (top) and MS-spectrum (bottom) for Ins-SA-Alb.
